# Supplementary material for: Acute Kidney Injury Predicts Major Adverse Outcomes in Diabetes: Synergic Impact With Low Glomerular Filtration Rate and Albuminuria
Source: Oxford University Press journal article supplement (doi:10.2337/dc15-1222), 2015-10-28
Supplement: dc151222supplementarydata.pdf [file dc151222supplementarydata.pdf]

## SUPPLEMENTARY DATA

### Sensitivity analyses

The results were not qualitatively modified in the sensitivity analyses when other definitions of AKI were used. When the first serum creatinine value during hospitalization was considered as the reference serum creatinine, AKI occurred in 243 patients and remained a significant predictor of all-cause (HR=4.84 [3.68–6.35],  $p<0.0001$ ), cardiovascular (HR=4.94 [3.47–7.04],  $p<0.0001$ ) and non-cardiovascular death (HR=4.75 [3.11–7.25],  $p<0.0001$ ) in the multivariate models.

When the lowest creatinine value within one year before hospitalization was considered as the reference serum creatinine, AKI was observed in 149 patients and remained a predictor of all-cause (HR=4.49 [3.34–6.04],  $p<0.0001$ ), cardiovascular (HR=3.95 [2.66–5.87],  $p<0.0001$ ) and non-cardiovascular (HR=5.47 [3.51–8.53],  $p<0.0001$ ) deaths in the multivariate models.

When events occurring within one month following were censored, the results were qualitatively unchanged (Supplemental Table)

**Supplementary Table 1. AKI, eGFR and albuminuria as predictors of death (when events were censored after one month following AKI).**

|                                          | Univariate* |           |                   | Multivariate* |           |                   |
|------------------------------------------|-------------|-----------|-------------------|---------------|-----------|-------------------|
|                                          | HR          | 95% CI    | p value           | HR            | 95% CI    | p value           |
| <b>All cause deaths</b>                  |             |           |                   |               |           |                   |
| AKI (yes vs no)                          | 5.53        | 4.24-7.21 | <b>&lt;0.0001</b> | 4.31          | 3.31-5.61 | <b>&lt;0.0001</b> |
| eGFR (per 10 ml/min/1.73m <sup>2</sup> ) | 0.92        | 0.87-0.97 | <b>0.0033</b>     | 0.91          | 0.87-0.96 | <b>0.0008</b>     |
| Albuminuria (log mg/mmol)                | 1.38        | 1.19-1.59 | <b>&lt;0.0001</b> | 1.40          | 1.21-1.62 | <b>&lt;0.0001</b> |
| <b>Cardiovascular deaths</b>             |             |           |                   |               |           |                   |
| AKI (yes vs no)                          | 4.81        | 3.39-6.82 | <b>&lt;0.0001</b> | 3.87          | 2.74-5.48 | <b>&lt;0.0001</b> |
| eGFR (per 10 ml/min/1.73m <sup>2</sup> ) | 0.87        | 0.81-0.94 | <b>0.0002</b>     | 0.87          | 0.80-0.93 | <b>&lt;0.0001</b> |
| Albuminuria (log mg/mmol)                | 1.46        | 1.20-1.77 | <b>0.0002</b>     | 1.48          | 1.28-1.80 | <b>0.0001</b>     |
| <b>Non-cardiovascular deaths</b>         |             |           |                   |               |           |                   |
| AKI (yes vs no)                          | 6.43        | 4.35-9.51 | <b>&lt;0.0001</b> | 4.89          | 3.30-7.23 | <b>&lt;0.0001</b> |
| eGFR (per 10 ml/min/1.73m <sup>2</sup> ) | -           | -         | -                 | -             | -         | -                 |
| Albuminuria (log mg/mmol)                | 1.28        | 1.05-1.57 | <b>0.0167</b>     | 1.33          | 1.09-1.64 | <b>0.0057</b>     |

SUPPLEMENTARY DATA

**Supplementary Figure 1. Survival rates according to the development and stage of AKI.**

For all-cause death, cardiovascular death and non-cardiovascular death, survival rate were significantly lower in patients with AKI than in those without. The plot describes survival for the reference group (no AKI) and each AKI groups separately.

Abbreviations: CV: cardiovascular, AKI: acute kidney injury

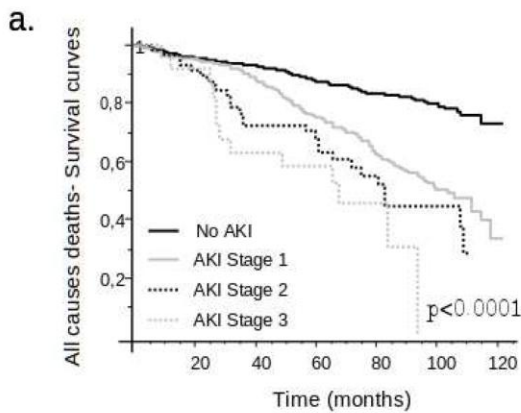

| Number at risk | 0   | 20  | 40  | 60  | 80  | 100 | 120 |
|----------------|-----|-----|-----|-----|-----|-----|-----|
| No AKI         | 960 | 739 | 587 | 470 | 322 | 120 | 3   |
| AKI Stage1     | 329 | 299 | 245 | 186 | 118 | 46  | 2   |
| AKI Stage2     | 58  | 52  | 36  | 29  | 18  | 7   | 0   |
| AKI Stage3     | 24  | 19  | 13  | 11  | 4   | 0   | 0   |

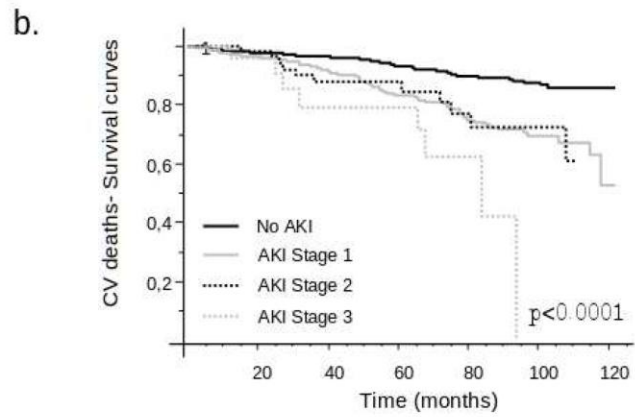

| Number at risk | 0   | 20  | 40  | 60  | 80  | 100 | 120 |
|----------------|-----|-----|-----|-----|-----|-----|-----|
| No AKI         | 960 | 739 | 587 | 470 | 322 | 120 | 3   |
| AKI Stage1     | 329 | 299 | 245 | 186 | 118 | 46  | 2   |
| AKI Stage2     | 58  | 52  | 36  | 29  | 18  | 7   | 0   |
| AKI Stage3     | 24  | 19  | 13  | 11  | 4   | 0   | 0   |

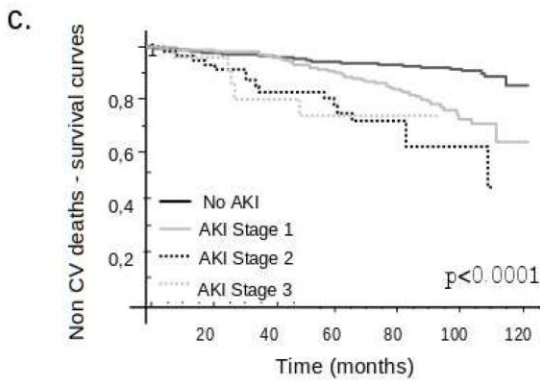

| Number at risk | 0   | 20  | 40  | 60  | 80  | 100 | 120 |
|----------------|-----|-----|-----|-----|-----|-----|-----|
| No AKI         | 960 | 739 | 587 | 470 | 322 | 120 | 3   |
| AKI Stage1     | 329 | 299 | 245 | 186 | 118 | 46  | 2   |
| AKI Stage2     | 58  | 52  | 36  | 29  | 18  | 7   | 0   |
| AKI Stage3     | 24  | 19  | 13  | 11  | 4   | 0   | 0   |
